# Supplementary material for: Tubulin polyglutamylation differentially regulates microtubule‐interacting proteins
Source: PubMed Central journal article supplement — EMBO J. 2023 Jan 13;42(5):e112101. doi: 10.15252/embj.2022112101 (PMC9975938; doi:10.15252/embj.2022112101), 2023-01-13
Supplement: EMBJ-42-e112101-s005.pdf [file EMBJ-42-e112101-s005.pdf]

**Appendix to**

**Tubulin polyglutamylation differentially regulates microtubule-interacting proteins**

Mariya Genova, Lenka Grycova, Verena Puttrich, Maria M. Magiera, Zdenek Lansky,  
Carsten Janke, Marcus Braun

**Table of content:**

|                          |     |
|--------------------------|-----|
| Appendix Table S1 .....  | 2   |
| Appendix Table S2 .....  | 2   |
| Appendix Figure S1 ..... | 3   |
| Appendix Figure S2 ..... | 4-9 |

**Appendix Table S1. Primers and PCR conditions for genotyping.**

| mouse strain                | PCR N° | PCR primers                                                  | PCR product size              | annealing |      | elongation |      | N° of cycles |
|-----------------------------|--------|--------------------------------------------------------------|-------------------------------|-----------|------|------------|------|--------------|
|                             |        |                                                              |                               | time      | temp | time       | temp |              |
| <i>Ttll1</i> <sup>-/-</sup> | PCR1   | ACTCGTTCTGTGGCACCCCTGGC;<br>TGTGGTCCGCTCAGGTGCCTCC           | WT: 330 bp                    | 15 s      | 62°C | 20 s       | 72°C | 38           |
|                             | PCR2   | CAATGTGCTTGGCGGTTTCAGGATCCC;<br>GAACTCGACACCACCTGCAACCAACC   | KO: 520 bp<br>(WT: 1,500 bp)  |           |      |            |      |              |
| <i>Ttll7</i> <sup>-/-</sup> | PCR1   | CGACCGAGAACCTAGCTACTGCTCATT;<br>CGCTATGAAATAACCCTGATGCTGAAG  | WT: 320 bp                    |           |      |            |      |              |
|                             | PCR2   | TTCCTCATGACTTCACACTCCTCTGTG;<br>CGCTATGAAATAACCCTGATGCTGAAG  | KO: 330 bp;<br>(WT: 1,000 bp) |           |      |            |      |              |
| <i>Atat1</i> <sup>-/-</sup> | PCR1   | CCTCTCCCACTATTGTCTCTCATTATTG;<br>GCAGGTGTACATGCAGATAGAGTACTC | WT: 230 bp                    |           |      |            |      |              |
|                             | PCR2   | TATGCCCTTGATGGTGTGTCCCTG;<br>GCAGGTGTACATGCAGATAGAGTACTC     | KO: 370 bp                    |           |      |            |      |              |

**Appendix Table S2. Antibodies for immuno blot analyses**

| Antibody                            | Reference                                                                                                                                                                          | Description                                                                                           | Dilution |
|-------------------------------------|------------------------------------------------------------------------------------------------------------------------------------------------------------------------------------|-------------------------------------------------------------------------------------------------------|----------|
| 12G10                               | Developed by J. Frankel and M. Nelson, obtained from the Developmental Studies Hybridoma Bank, developed under the auspices of the NICHD, and maintained by the University of Iowa | $\alpha$ -tubulin, mouse monoclonal                                                                   | 1:5,000  |
| polyE                               | AdipoGen #AG-25B-0030                                                                                                                                                              | polyglutamylate chains longer than 3E with C-terminal E, rabbit polyclonal                            | 1:5,000  |
| $\beta$ -monoE                      | AdipoGen #AG-25B-0039                                                                                                                                                              | $\beta$ 2-tubulin C-terminal peptide sequence with 1E-branch at E435, rabbit polyclonal               | 1:5,000  |
| anti-tubulin, detyrosinated         | Sigma-Aldrich #AB3201                                                                                                                                                              | Peptide corresponding to detyrosinated C-terminus of $\alpha$ -tubulin (-CGEEEGEE), rabbit polyclonal | 1:1,000  |
| anti- $\Delta$ 2-tubulin            | Millipore #AB3203                                                                                                                                                                  | $\alpha$ -tubulin C-terminus lacking the last two amino acids, rabbit polyclonal                      | 1:5,000  |
| 6-11B-1 (acetyl- $\alpha$ -tubulin) | Sigma-Aldrich #T6793                                                                                                                                                               | K40 acetylation on $\alpha$ -tubulin, mouse monoclonal IgG2b                                          | 1:2,000  |
| HRP-anti-mouse                      | Bethyl #A90-516P                                                                                                                                                                   | HRP-conjugated goat anti mouse                                                                        | 1:10,000 |
| HRP-anti-rabbit                     | Bethyl #A120-201P                                                                                                                                                                  | HRP-conjugated goat anti rabbit                                                                       | 1:10,000 |

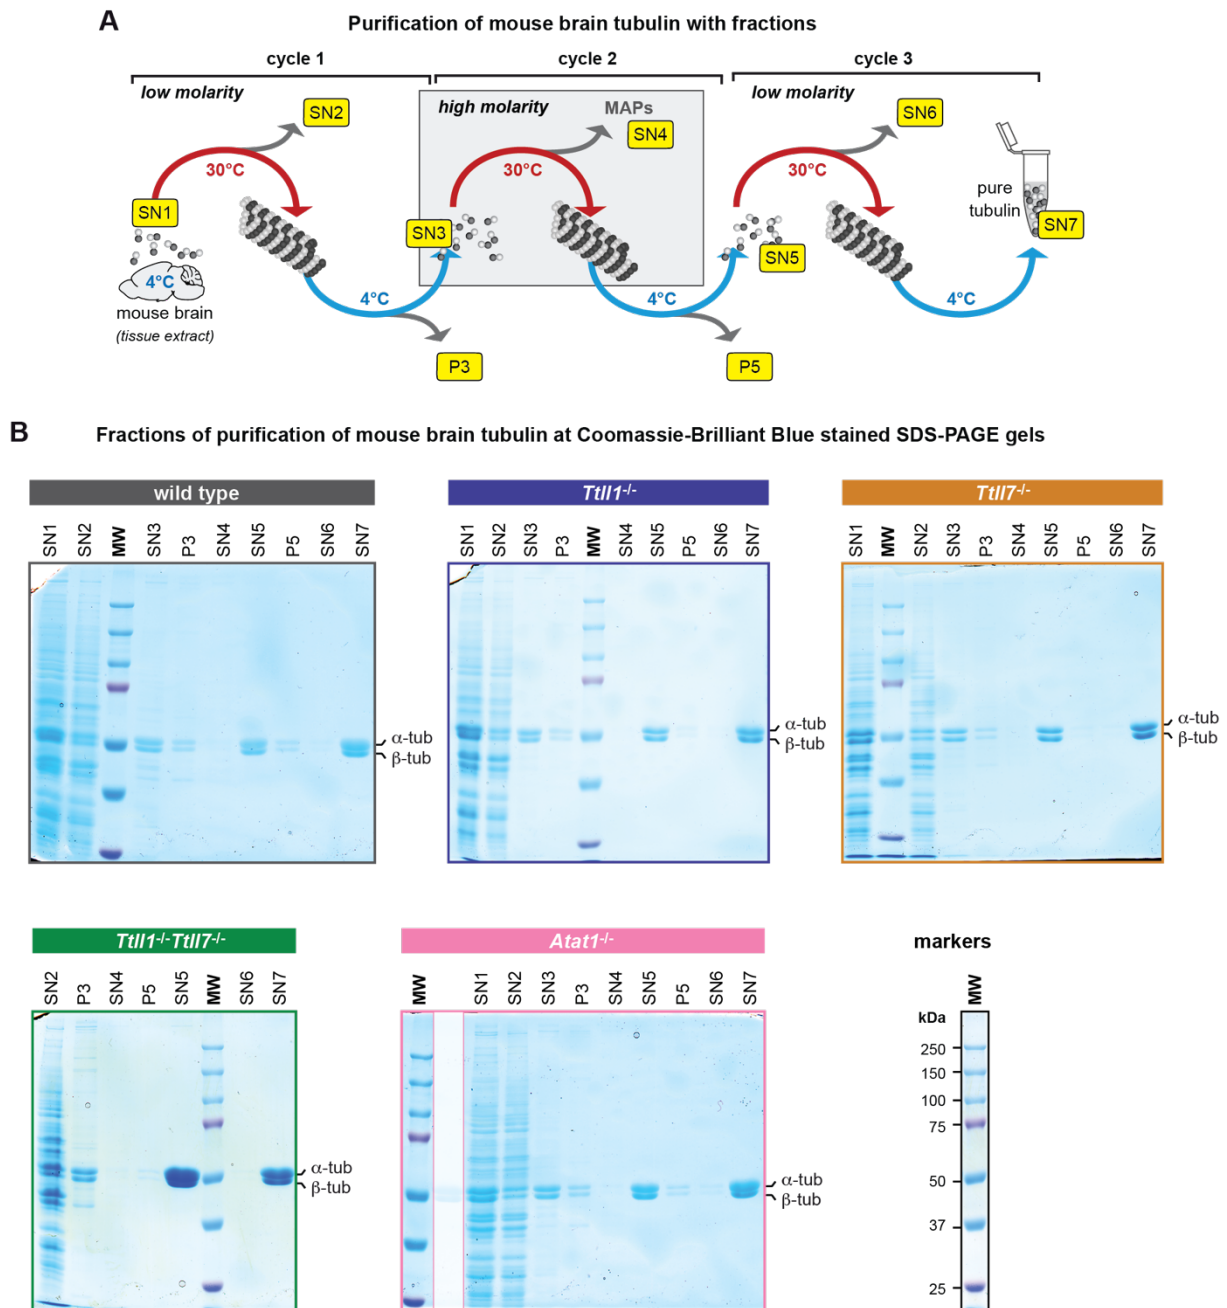

**Appendix Figure S1. Analyses of intermediate protein samples during tubulin purification** (complement to Fig 1; EV1).

**A)** Schematic overview of the tubulin purification pipeline from mouse brains using three cycles of temperature-induced polymerisation-depolymerisation as in Fig 1C; EV1A. The different fractions analysed in (B) are indicated. **B)** Representative examples of protein samples from different purification steps of tubulin from the five different PTM variants used in the current study. Annotation of one representative molecular weight markers (MW) is shown apart as markers are loaded at varying positions on different gels.

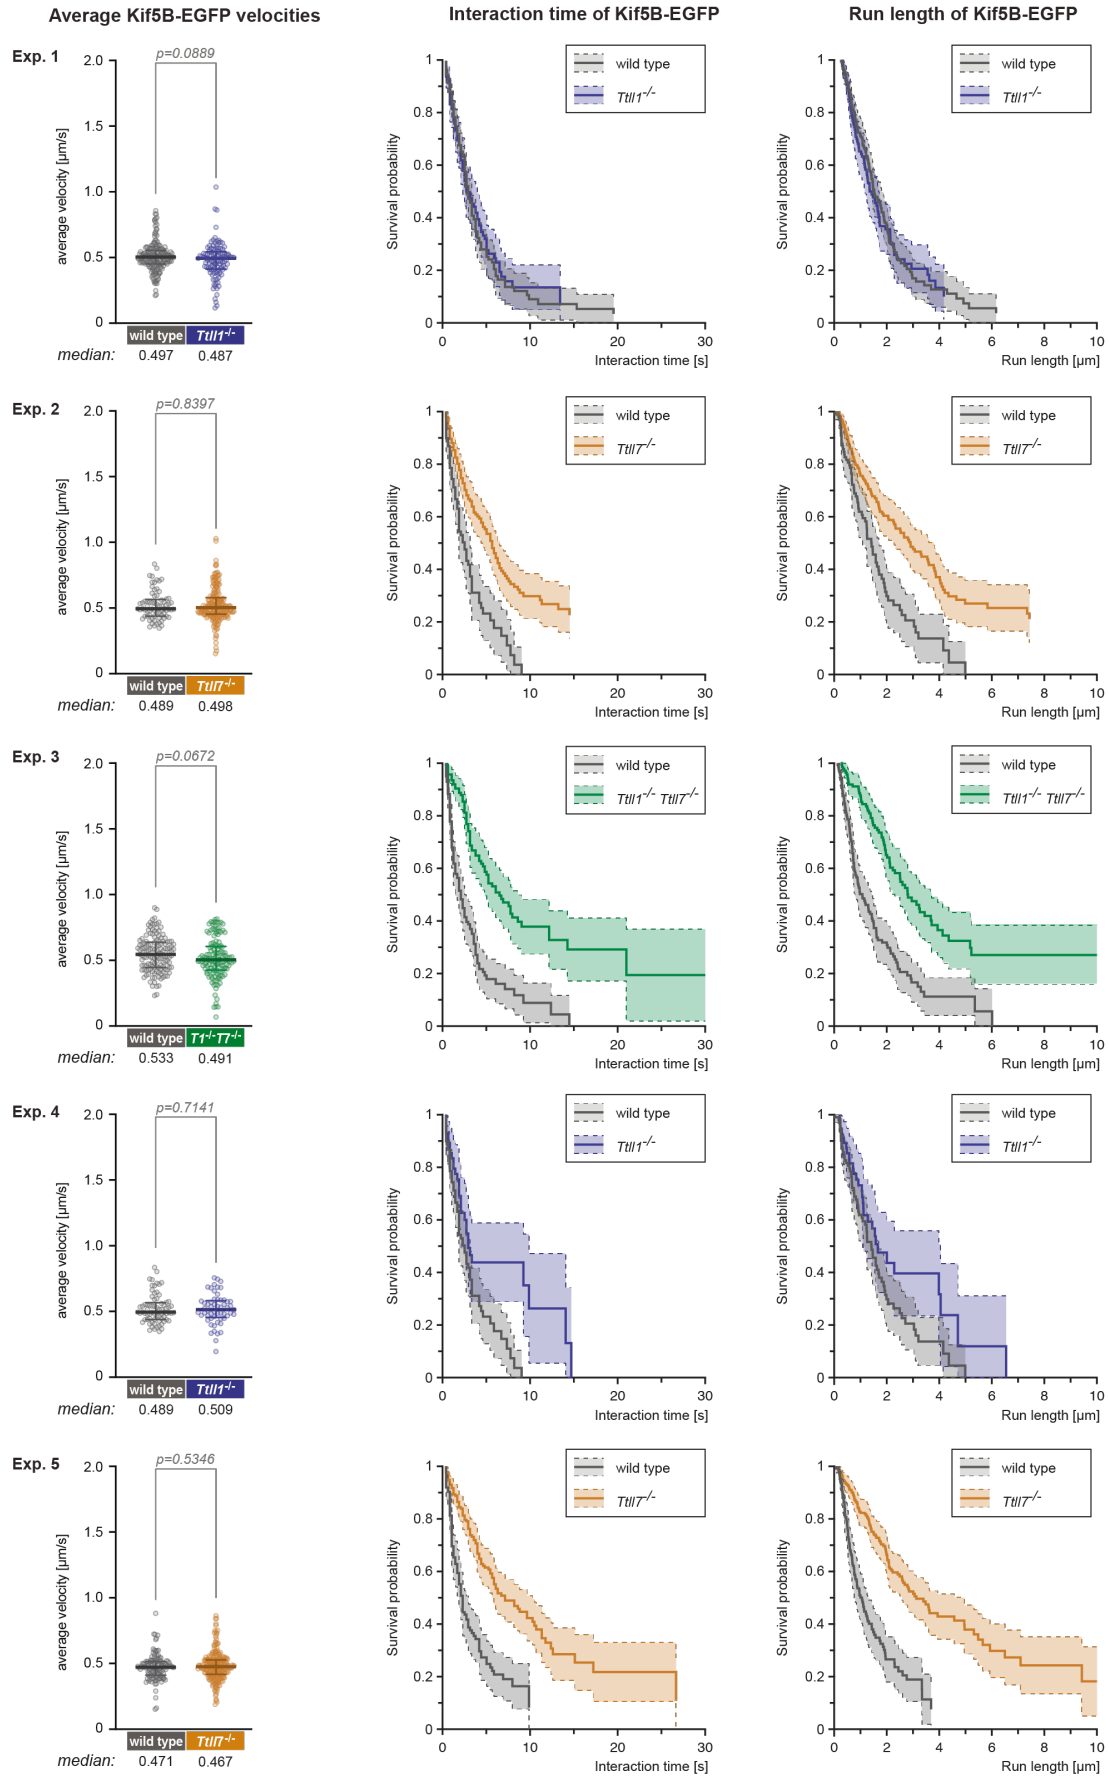

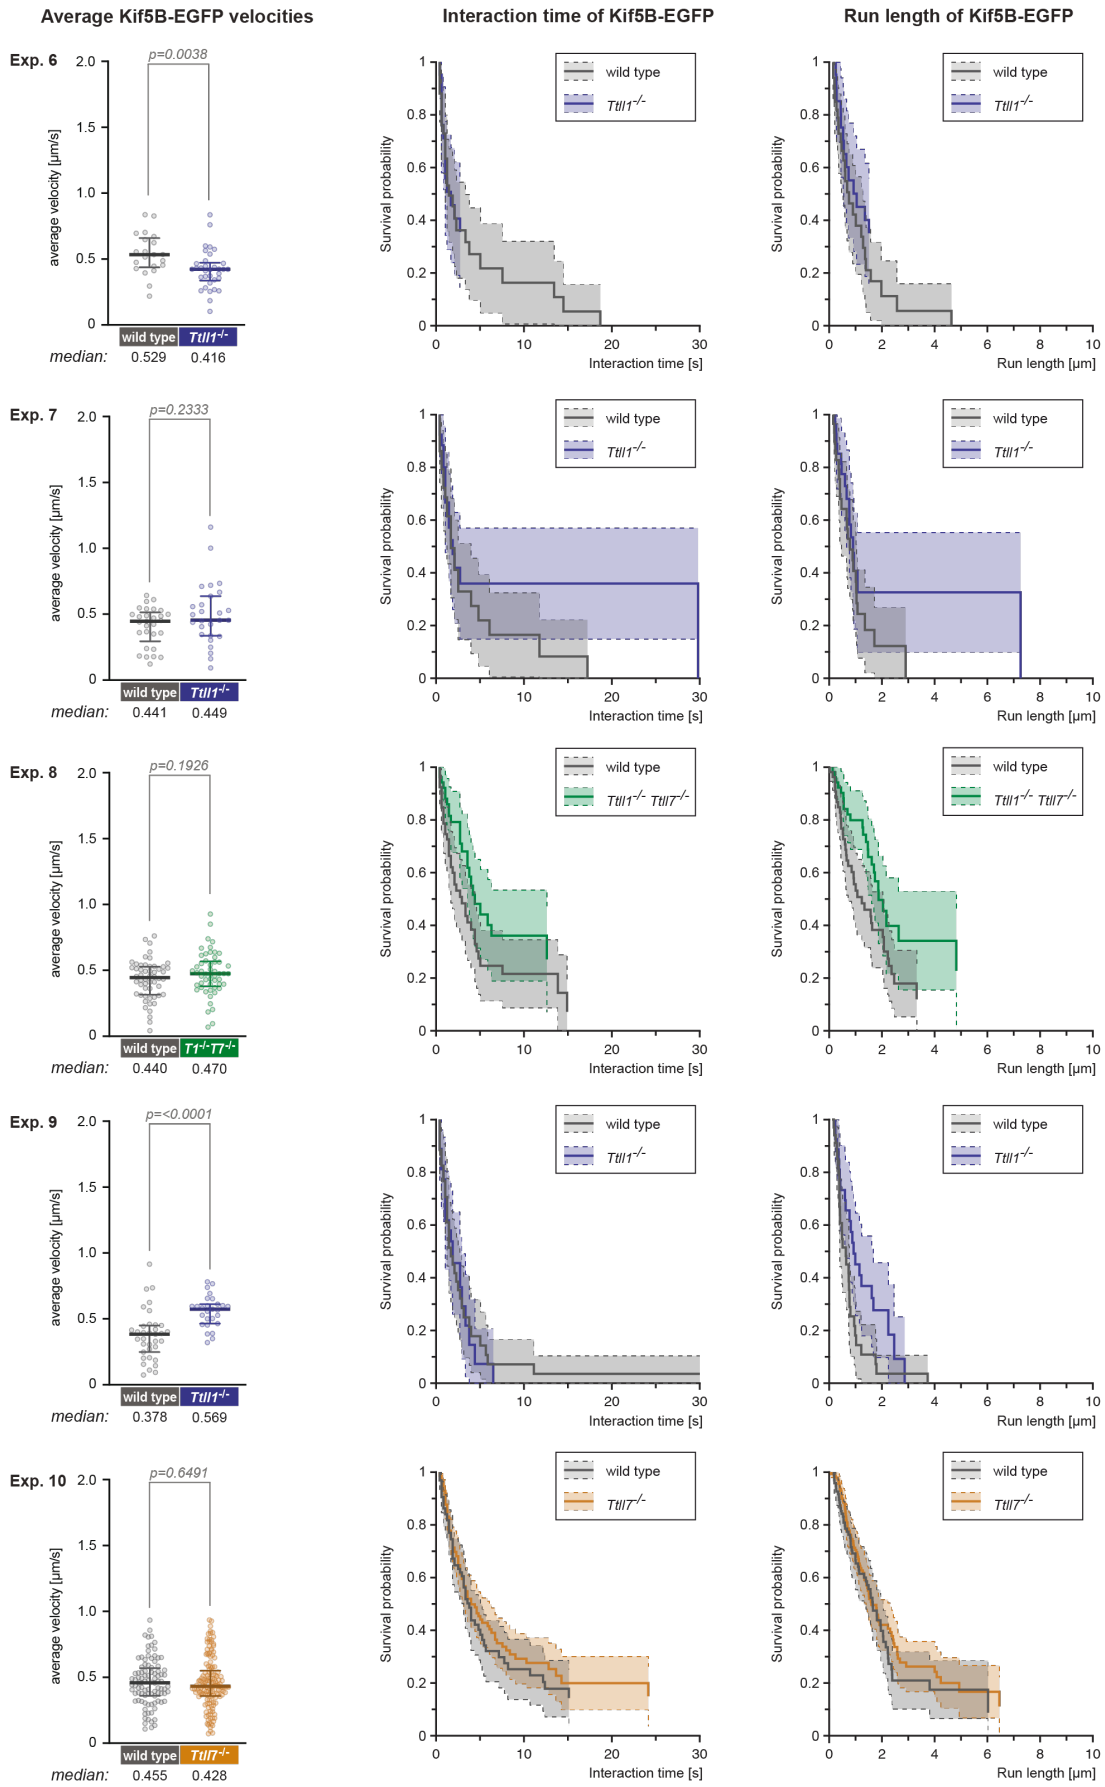

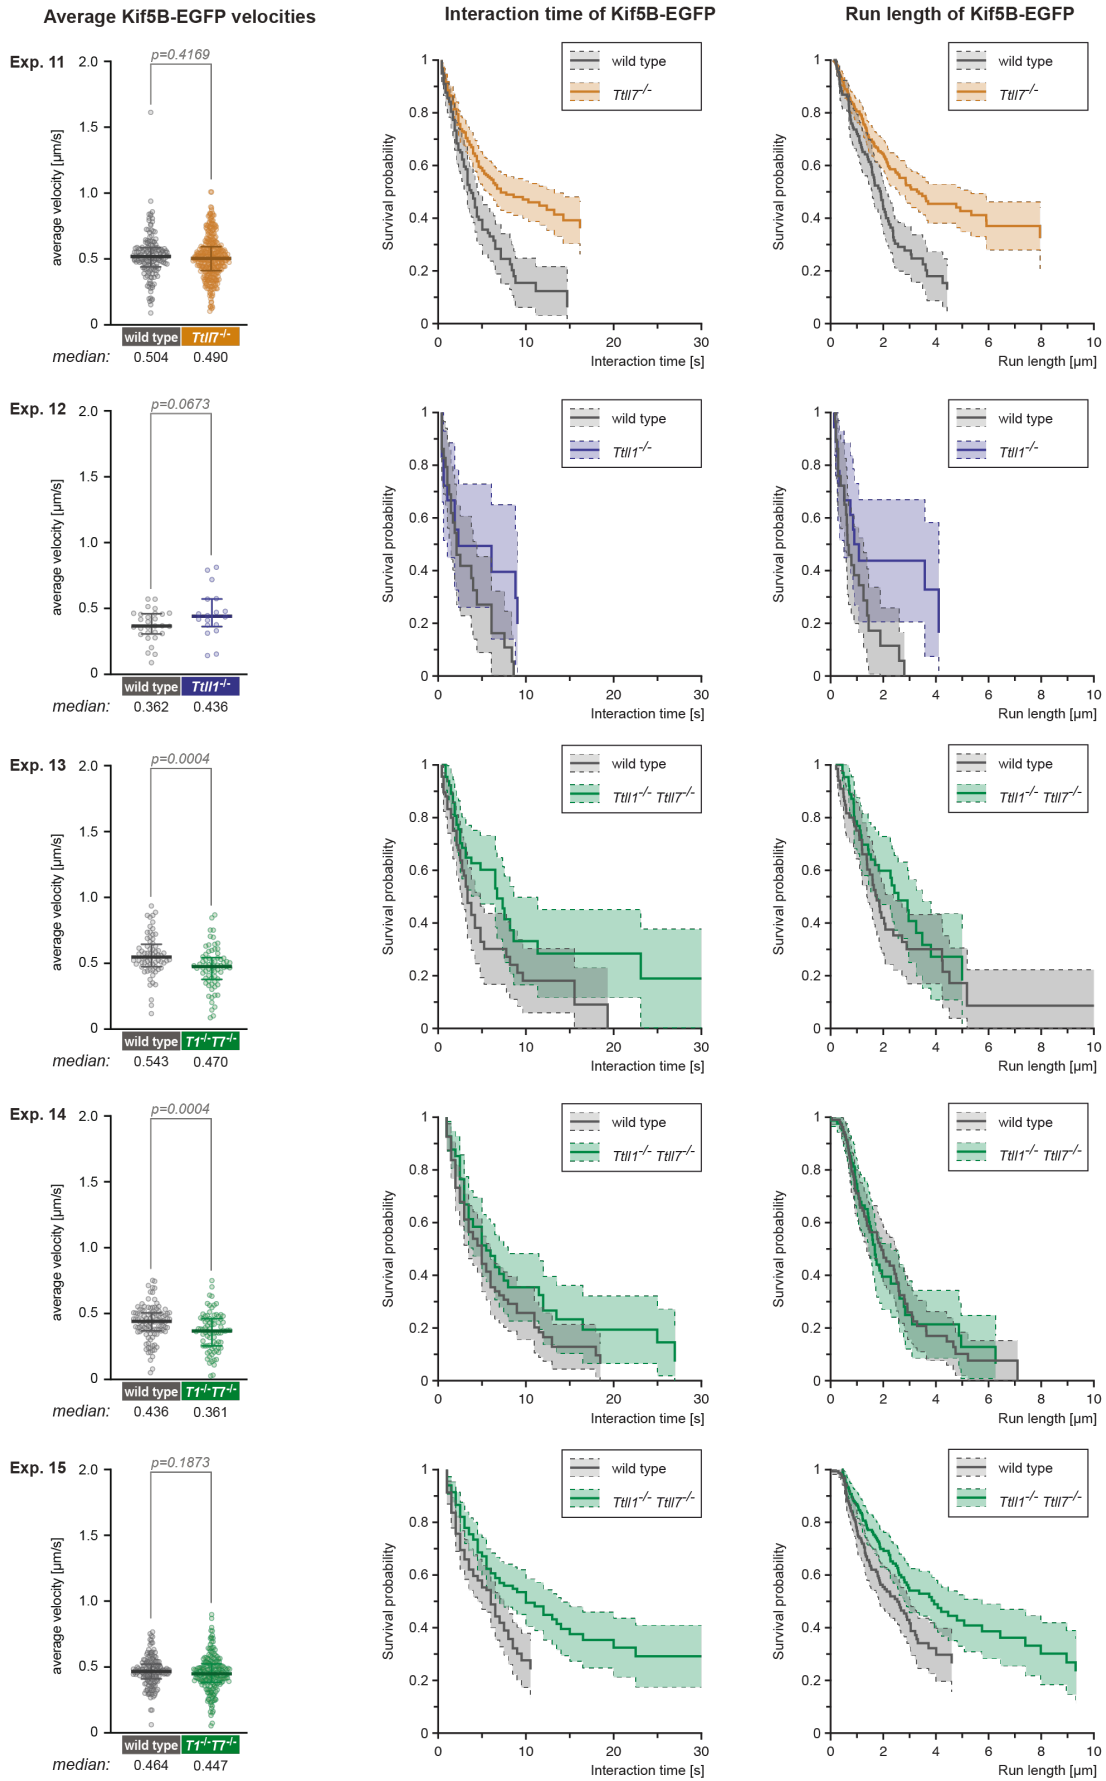

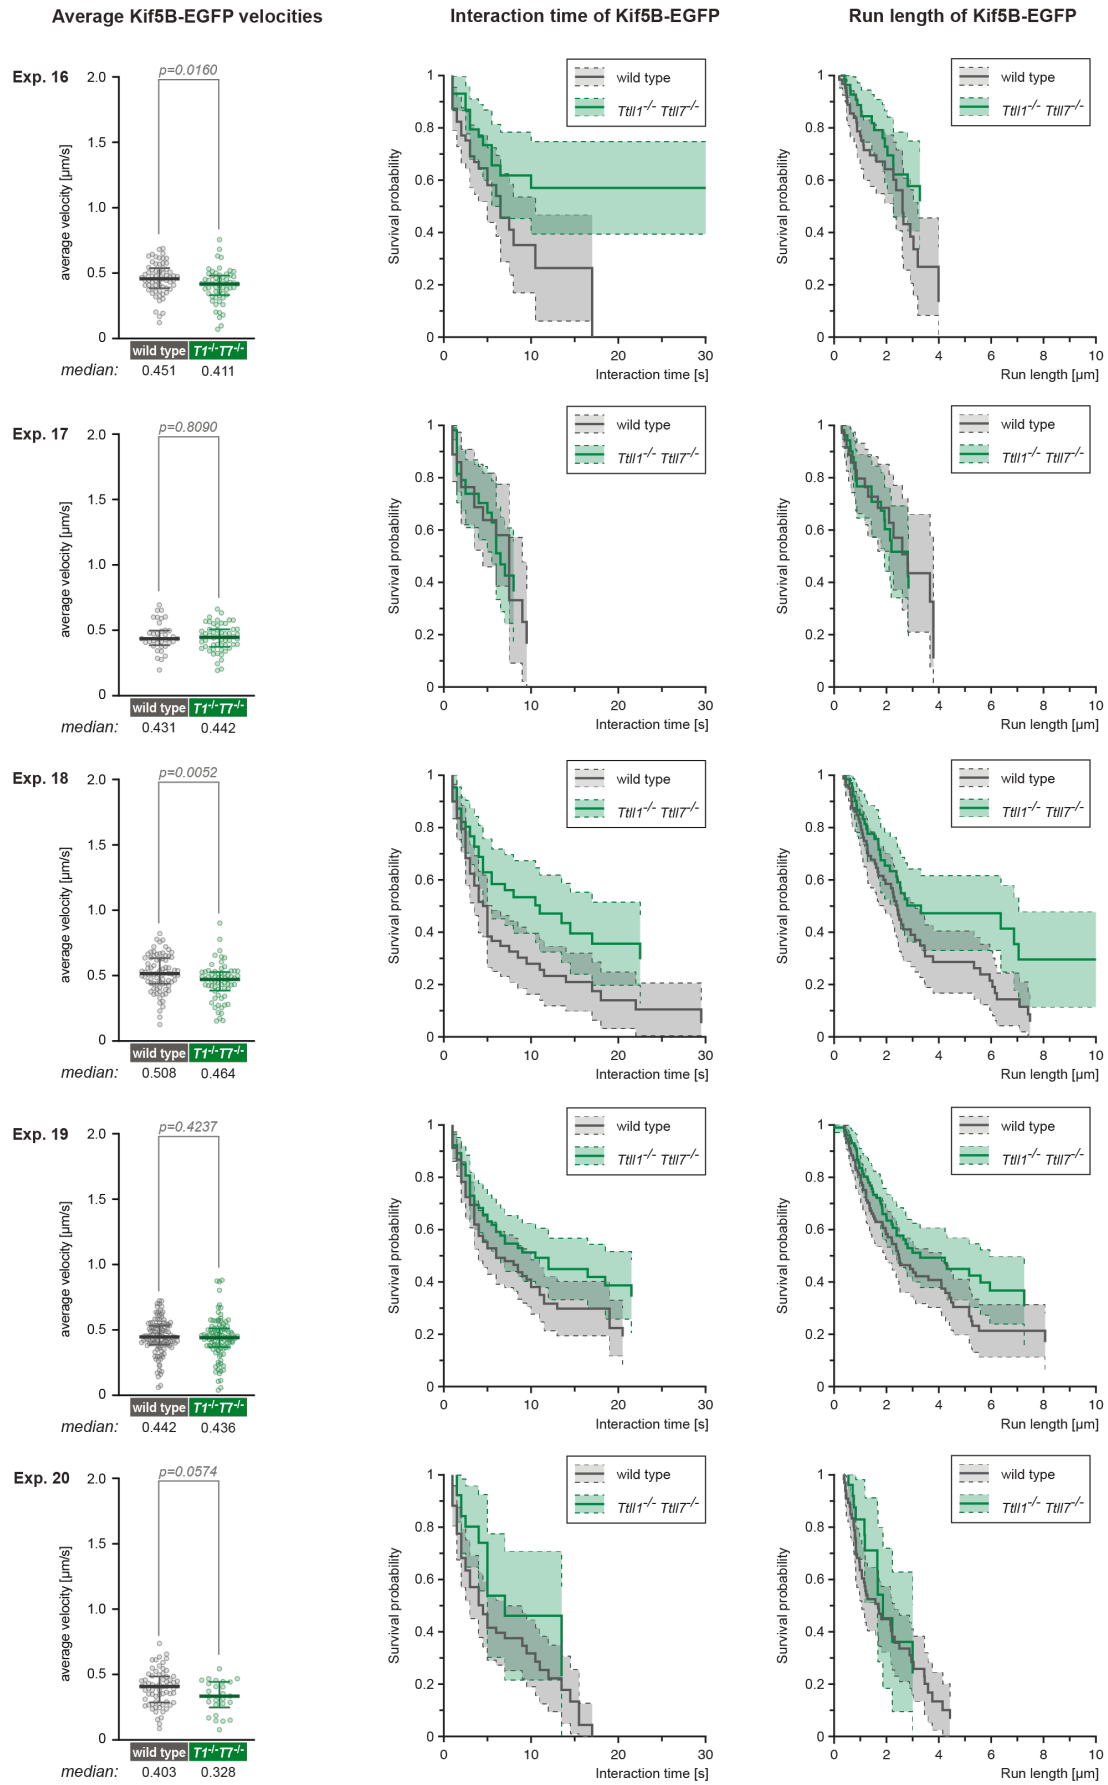

Average Kif5B-EGFP velocities

Interaction time of Kif5B-EGFP

Run length of Kif5B-EGFP

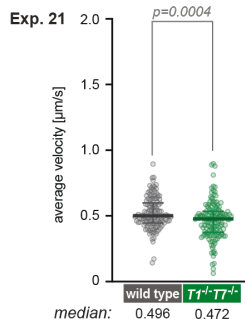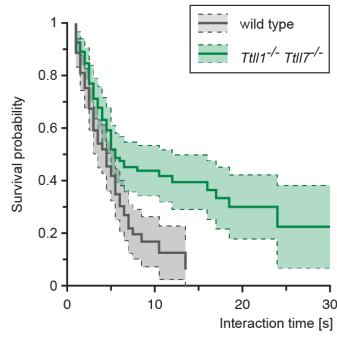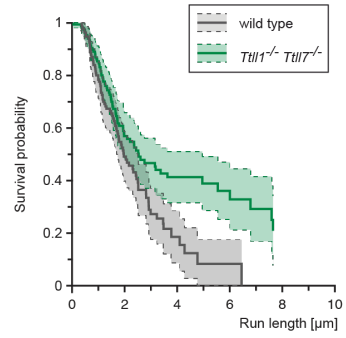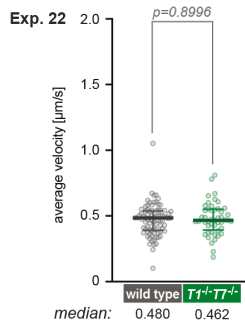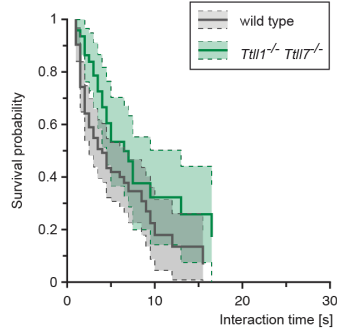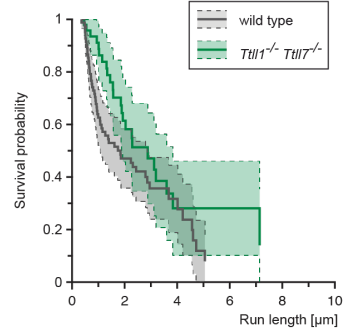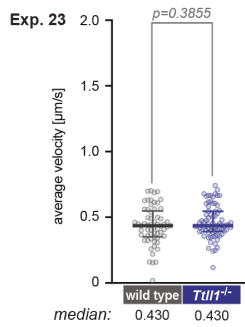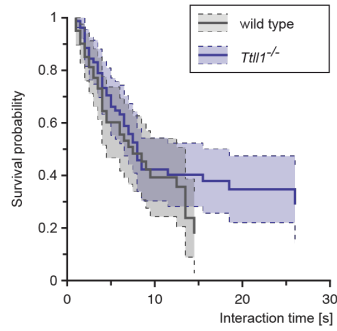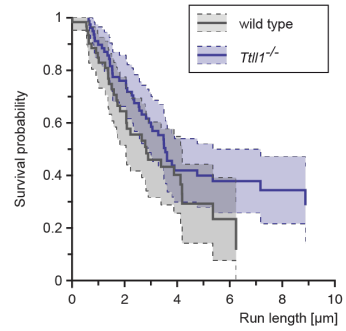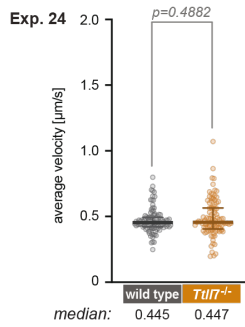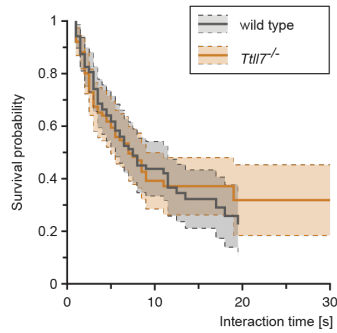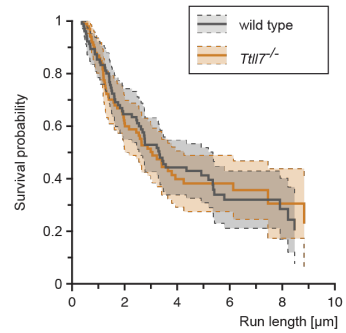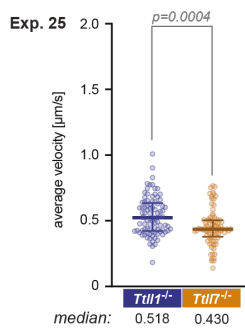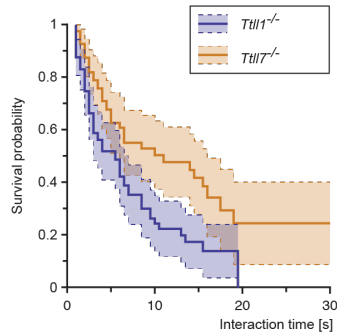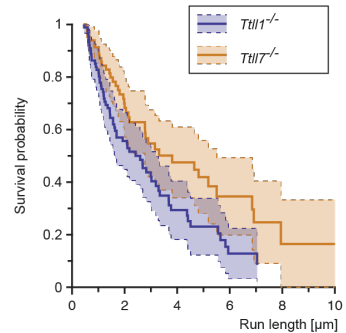



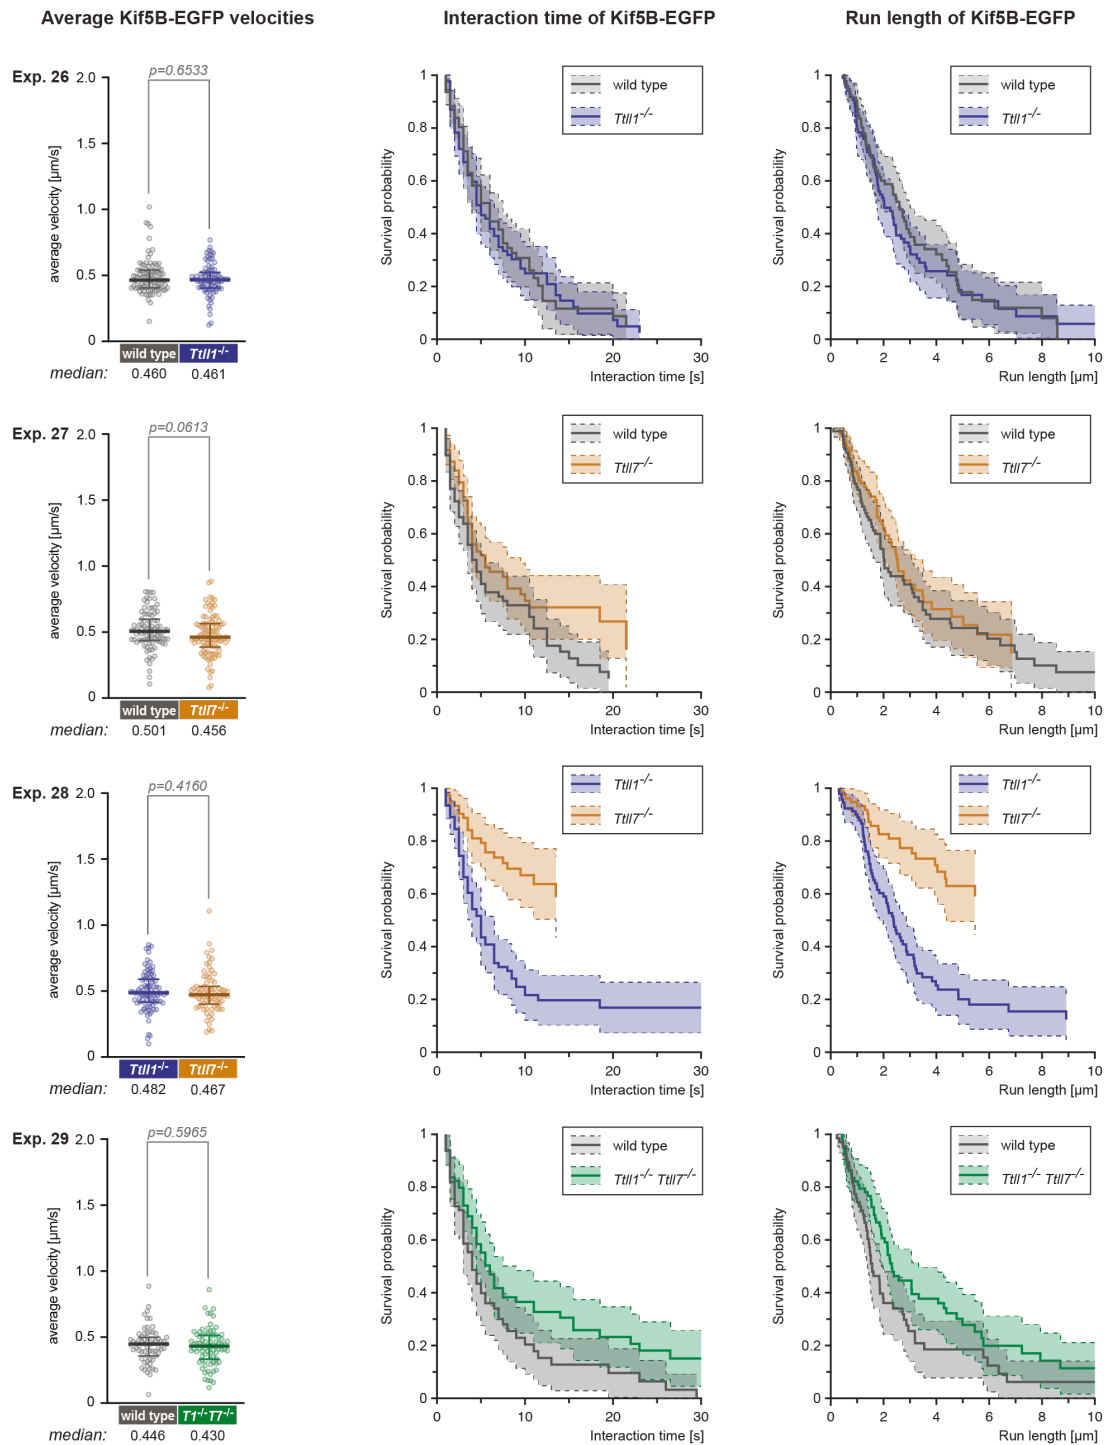

**Appendix Figure S2. Independent Kinesin-1 experiments** (complement to Fig 4C,D,E).

**A-F** Representation of individual experiments to determine Kif5B-GFP motility. First column: Scatter plots show average velocities ( $\mu\text{m/s}$ ) exhibited by single Kif5b-EGFP molecules on the different microtubule types. Medians with interquartile ranges shown, Mann-Whitney test, p-values displayed. Second and third column: Survival probability (Kaplan-Meier plots, taking varying microtubule lengths into account; see Methods) of the interaction time and run length of Kif5b-EGFP molecules on different microtubule types.
