# Supplementary figures and images for: Tubulin polyglutamylation differentially regulates microtubule‐interacting proteins
Source: PubMed Central journal article supplement — EMBO J. 2023 Jan 13;42(5):e112101. doi: 10.15252/embj.2022112101 (PMC9975938; doi:10.15252/embj.2022112101), 2023-01-13

**A**

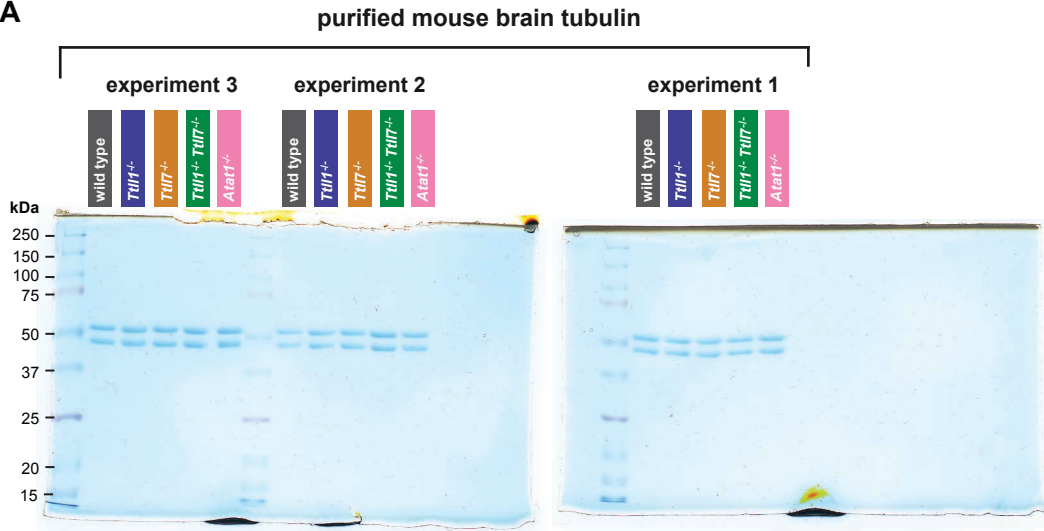

**B**

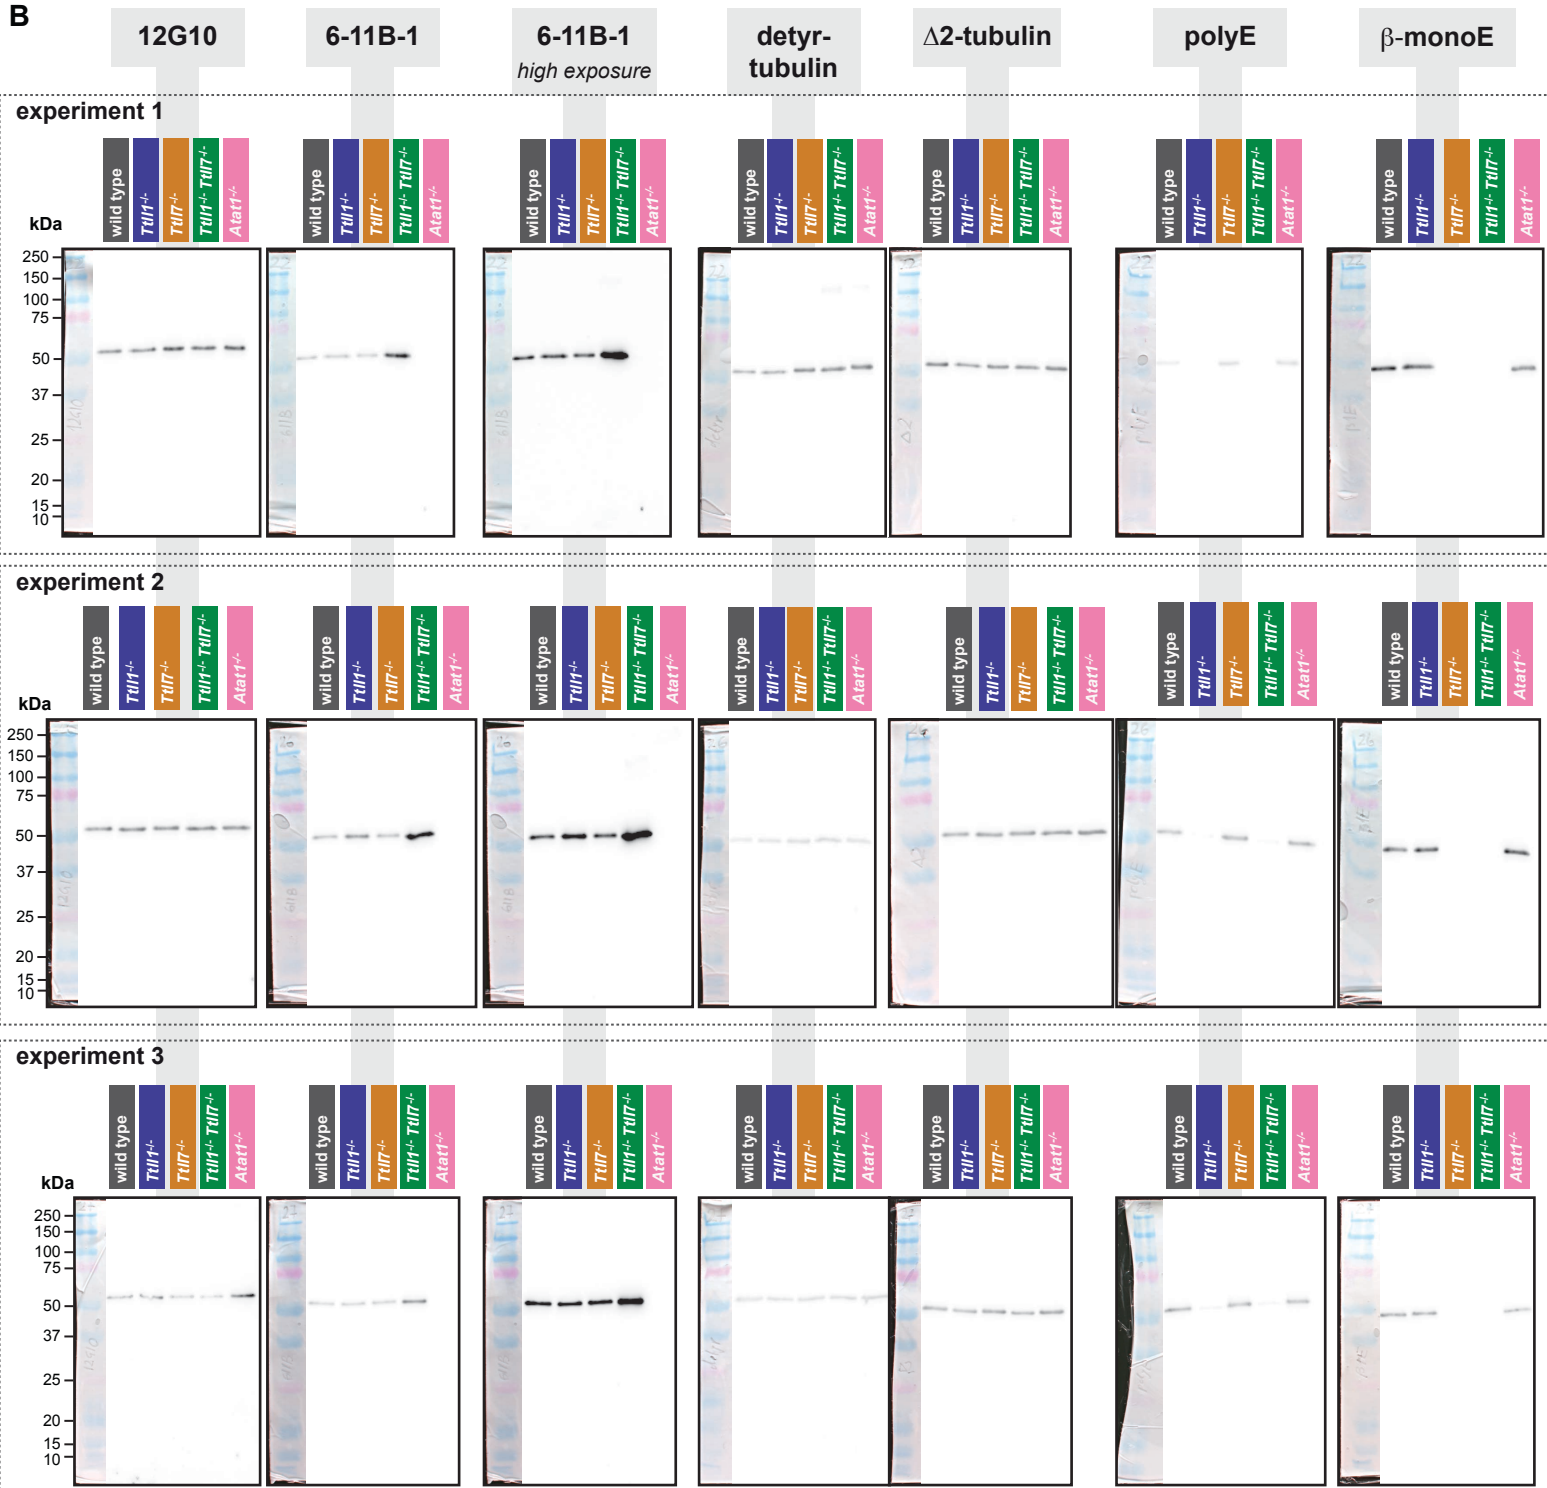

Supplement: EMBJ-42-e112101-s006.pdf [file EMBJ-42-e112101-s006.pdf]
